# Supplementary material for: RNA-Sequencing Analysis Revealed Genes Associated with Sweet Potato (Ipomoea batatas (L.) Lam.) Responses to Stem Rot during Different Infection Stages
Source: MDPI journal article supplement (doi:10.3390/genes14122215), 2023-12-14
Supplement: s1 [file s1]

## Supplementary Table

Table S1 Primer sequence

| Genes ID             | Symbol              | Primer sequence                                 |
|----------------------|---------------------|-------------------------------------------------|
| Ibat.Brg.01D_G026840 | <i>IbFEI1</i>       | AGTACATGCAAAGTGGCCGA<br>TGCCTGCACTCCTTCACAAT    |
| Ibat.Brg.02E_G006670 | <i>IbLRR-kinase</i> | CCTGGGAATTGCGAGAGGTT<br>GCCACGCATTGCATACTCAG    |
| Ibat.Brg.07D_G004510 | <i>IbPIRL2</i>      | AATCTGCAATGCCGCGAATC<br>TATTCTCTTCCGCCGCCATC    |
| Ibat.Brg.13C_G011370 | <i>IbIRL5</i>       | CTGCCACCAAGACCTTCCAT<br>TCAACAACACCGCCTCTCTC    |
| Ibat.Brg.03A_G009250 | <i>IbSERK4</i>      | TCAGGGCGGTTTTGGTAAGG<br>GGGTATACCAGAAGGCGCTC    |
| Ibat.Brg.05F_G002900 | <i>IbGLR2.5</i>     | TGGGATGGCGTTTCATGTGA<br>CCTGAGTTTCTCGAACCCCC    |
| Ibat.Brg.05B_G030500 | <i>IbSNL6</i>       | AGAATGTCCTAGAGGCATGTGC<br>ATTCCCCACGCTGCCTTTTC  |
| Ibat.Brg.03B_G004180 | <i>IbMAPKKK20</i>   | GTGTTGTTGGAGTTCGCTTCTC<br>GCCAATCCGAAATCCCCAATC |
| Ibat.Brg.02C_G017680 | <i>IbStk16</i>      | GGATGGAACCTTGCTGGACA<br>ATTGCAAGAGGTGGTAGCCC    |
| Ibat.Brg.06E_G021150 | <i>IbSTK38L</i>     | ATGGAATGCGATTGGTGGTC<br>CCCAACCTTGATTCCACATCAC  |
| Ibat.Brg.01F_G030190 | <i>IbRLK7</i>       | CTTGCCCAATGGAAGCTTATGG<br>TTTGCAAGGCCGAAATCTGC  |
| Ibat.Brg.15B_G024350 | <i>IbRLK5</i>       | AATTTGAGCGGCGAAATCCC<br>TTGCCGAAAACCTCAAAGGC    |
| Ibat.Brg.13C_G025850 | <i>IbRLP4</i>       | AGGCAAGAGGGTGTGTTGATG<br>AGATCAGCTGGCACAATAGC   |
| Ibat.Brg.01D_G026840 | <i>IbFEI1</i>       | AGTACATGCAAAGTGGCCGA<br>TGCCTGCACTCCTTCACAAT    |
| JX177359             | <i>IbARF</i>        | CTTTGCCAAGAAGGAGATGC<br>TCTTGTCTGACCACCAACA     |

Table S2 Data filtering statistical table

| Sample | Raw Data | Clean Data (%)    | Adapter (%)    | Low Quality (%) | Poly A (%) | N (%)        |
|--------|----------|-------------------|----------------|-----------------|------------|--------------|
| T1-1   | 68647334 | 68270444 (99.45%) | 27398 (0.04%)  | 349296 (0.51%)  | 0 (0.00%)  | 196 (0.00%)  |
| T1-2   | 76133694 | 75724958 (99.46%) | 36120 (0.05%)  | 371532 (0.49%)  | 0 (0.00%)  | 1084 (0.00%) |
| T1-3   | 72375724 | 72001774 (99.48%) | 28154 (0.04%)  | 345616 (0.48%)  | 0 (0.00%)  | 180 (0.00%)  |
| T2-1   | 67369710 | 66845856 (99.22%) | 81710 (0.12%)  | 442110 (0.66%)  | 0 (0.00%)  | 34 (0.00%)   |
| T2-2   | 69275988 | 68765074 (99.26%) | 72490 (0.10%)  | 438148 (0.63%)  | 0 (0.00%)  | 276 (0.00%)  |
| T2-3   | 69334552 | 68799308 (99.23%) | 80984 (0.12%)  | 453944 (0.65%)  | 0 (0.00%)  | 316 (0.00%)  |
| T3-1   | 67691814 | 67165224 (99.22%) | 77444 (0.11%)  | 449106 (0.66%)  | 0 (0.00%)  | 40 (0.00%)   |
| T3-2   | 69340112 | 68763092 (99.17%) | 77270 (0.11%)  | 499408 (0.72%)  | 0 (0.00%)  | 342 (0.00%)  |
| T3-3   | 64391870 | 63856990 (99.17%) | 106688 (0.17%) | 427604 (0.66%)  | 0 (0.00%)  | 588 (0.00%)  |

Note: RawData: original number of reads offline; CleanData (%): number of high-quality reads and percentage (based on RawReads); Adapter (%): number of reads containing adapter and percentage (based on RawReads); LowQuality (%): low-quality reads, that is, number of reads with more than 50% base mass value  $Q \leq 20$  in single-ended read and (based on RawReads) percentage; polyA (%): number of polyA reads and (based on RawReads) percentage. N (%): number of highly filtered reads with N ratio and (based on RawReads) percentage.

Table S3 Comparison of q-PCR and transcriptome data

| ID                   | Symbol     | Treatm<br>ent | q-PCR         |       | FPKM          |       |
|----------------------|------------|---------------|---------------|-------|---------------|-------|
|                      |            |               | Mean<br>value | SD    | Mean<br>value | SD    |
| Ibat.Brg.01D_G026840 | FEI1       | T1            | 0.032         | 0.004 | 13.645        | 0.862 |
|                      |            | T2            | 0.008         | 0.001 | 3.903         | 0.285 |
|                      |            | T3            | 0.001         | 0.001 | 0.469         | 0.255 |
| Ibat.Brg.02E_G006670 | LRR-Kinase | T1            | 0.044         | 0.001 | 26.504        | 0.505 |
|                      |            | T2            | 0.023         | 0.008 | 8.573         | 0.326 |
|                      |            | T3            | 0.013         | 0.004 | 3.278         | 0.549 |
| Ibat.Brg.07D_G004510 | RIRL2      | T1            | 0.005         | 0.005 | 2.661         | 0.406 |
|                      |            | T2            | 0.099         | 0.030 | 29.203        | 1.964 |
|                      |            | T3            | 0.159         | 0.004 | 49.566        | 3.761 |
| Ibat.Brg.13C_G011370 | IRL5       | T1            | 0.000         | 0.000 | 0.199         | 0.199 |
|                      |            | T2            | 0.009         | 0.004 | 8.632         | 0.903 |
|                      |            | T3            | 0.011         | 0.007 | 17.113        | 2.204 |
| Ibat.Brg.03A_G009250 | SERK4      | T1            | 0.006         | 0.001 | 6.902         | 0.437 |
|                      |            | T2            | 0.017         | 0.006 | 24.756        | 0.952 |
|                      |            | T3            | 0.020         | 0.003 | 34.066        | 1.268 |
| Ibat.Brg.05F_G002900 | GLR2.5     | T1            | 0.000         | 0.000 | 0.512         | 0.099 |
|                      |            | T2            | 0.015         | 0.005 | 5.707         | 0.502 |
|                      |            | T3            | 0.062         | 0.011 | 19.068        | 1.216 |
| Ibat.Brg.05B_G030500 | SNL6       | T1            | 0.001         | 0.001 | 14.016        | 0.576 |
|                      |            | T2            | 0.006         | 0.007 | 42.713        | 2.992 |
|                      |            | T3            | 0.029         | 0.009 | 72.330        | 5.978 |
| Ibat.Brg.03B_G004180 | MAPKKK20   | T1            | 0.060         | 0.008 | 43.837        | 2.391 |
|                      |            | T2            | 0.015         | 0.002 | 8.152         | 0.934 |
|                      |            | T3            | 0.008         | 0.002 | 3.736         | 0.592 |
| Ibat.Brg.02C_G017680 | STK16      | T1            | 0.018         | 0.004 | 21.750        | 1.204 |
|                      |            | T2            | 0.001         | 0.001 | 6.082         | 0.313 |
|                      |            | T3            | 0.007         | 0.004 | 3.018         | 0.732 |
| Ibat.Brg.06E_G021150 | STK38L     | T1            | 0.061         | 0.018 | 35.147        | 1.080 |
|                      |            | T2            | 0.065         | 0.003 | 21.235        | 2.632 |
|                      |            | T3            | 0.041         | 0.005 | 7.634         | 1.004 |
| Ibat.Brg.01F_G030190 | RLK7       | T1            | 0.063         | 0.015 | 23.027        | 0.373 |
|                      |            | T2            | 0.064         | 0.012 | 19.119        | 0.240 |
|                      |            | T3            | 0.013         | 0.001 | 2.716         | 0.274 |
| Ibat.Brg.15B_G024350 | PLK5       | T1            | 0.025         | 0.008 | 12.159        | 1.755 |
|                      |            | T2            | 0.004         | 0.000 | 10.699        | 1.186 |
|                      |            | T3            | 0.003         | 0.005 | 2.296         | 0.696 |
| Ibat.Brg.13C_G025850 | RLP4       | T1            | 0.005         | 0.002 | 8.899         | 0.430 |
|                      |            | T2            | 0.001         | 0.000 | 3.575         | 0.243 |
|                      |            | T3            | 0.001         | 0.000 | 1.481         | 0.071 |
